# Supplementary material
Source: PubMed Central journal article supplement (PMC5889372)
Supplement: 13205_2018_1234_MOESM1_ESM.pdf [file 13205_2018_1234_MOESM1_ESM.pdf]

## Electronic Supplementary Material

**Article Title:** Codon Optimization Significantly Enhanced the Expression of Human 37 kDa iLRP in *Escherichia coli*

**Journal Name:** 3 Biotech

**Authors:** Bainan Liu<sup>¶</sup>, Qianqian Kong<sup>¶</sup>, Dong Zhang, Lingli Yan.

**Affiliations:** Department of Immunology, Zunyi Medical University, Zunyi, Guizhou Province 563000, China

**Corresponding Author:** Bainan Liu, Ph.D.

**E-mail:** bnliu@hotmail.com

**Phone:** +86-851-28642716

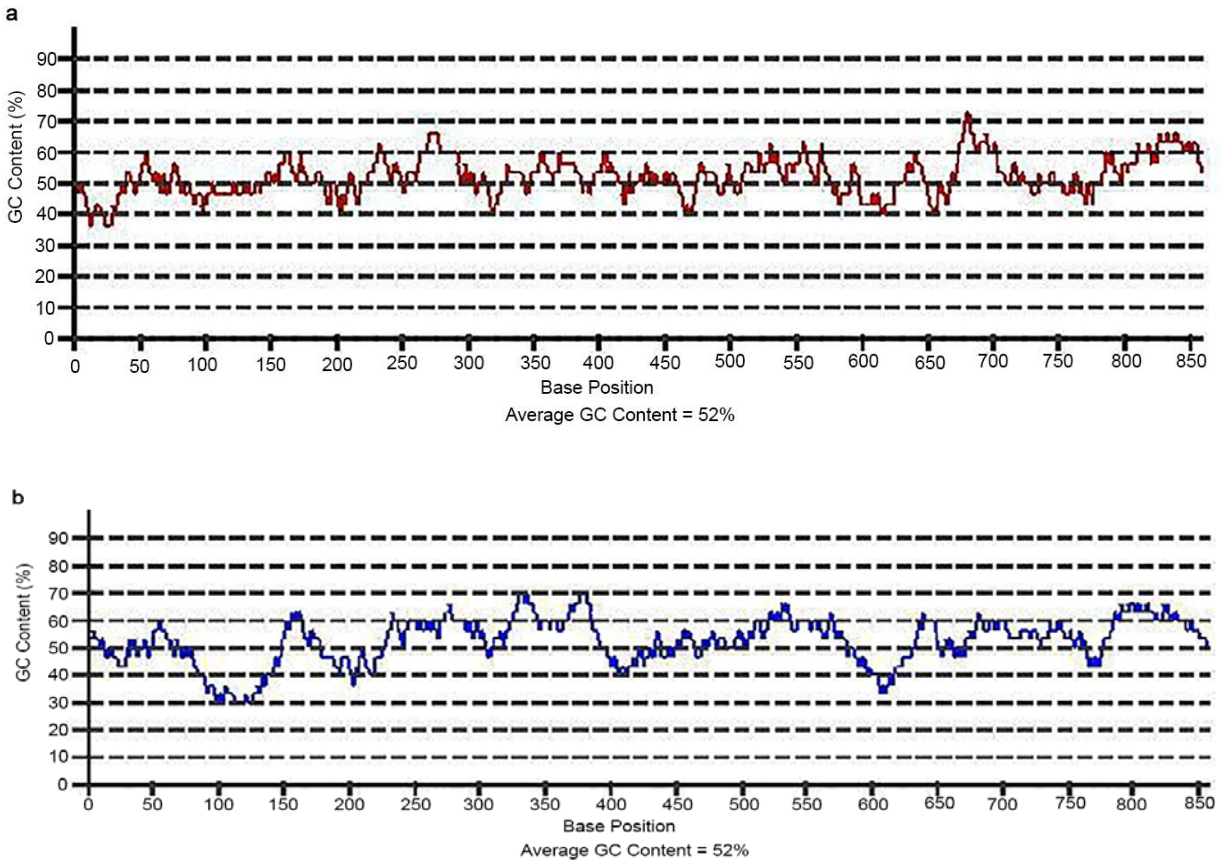

**Fig. S1** The GC content of optimized gene and wild-type gene. Y axis represents local GC content calculated using the window of 30 base pairs, and X axis represents base position. Although the average value of GC content for both genes is 52%, a smoother variation curve of GC content was obtained after optimization, with significant changes at base positions 50 to 100 and 300 to 400. The figure part **a** denotes the variation curve for the optimized *iLRP* gene, and the part **b** for the wild gene

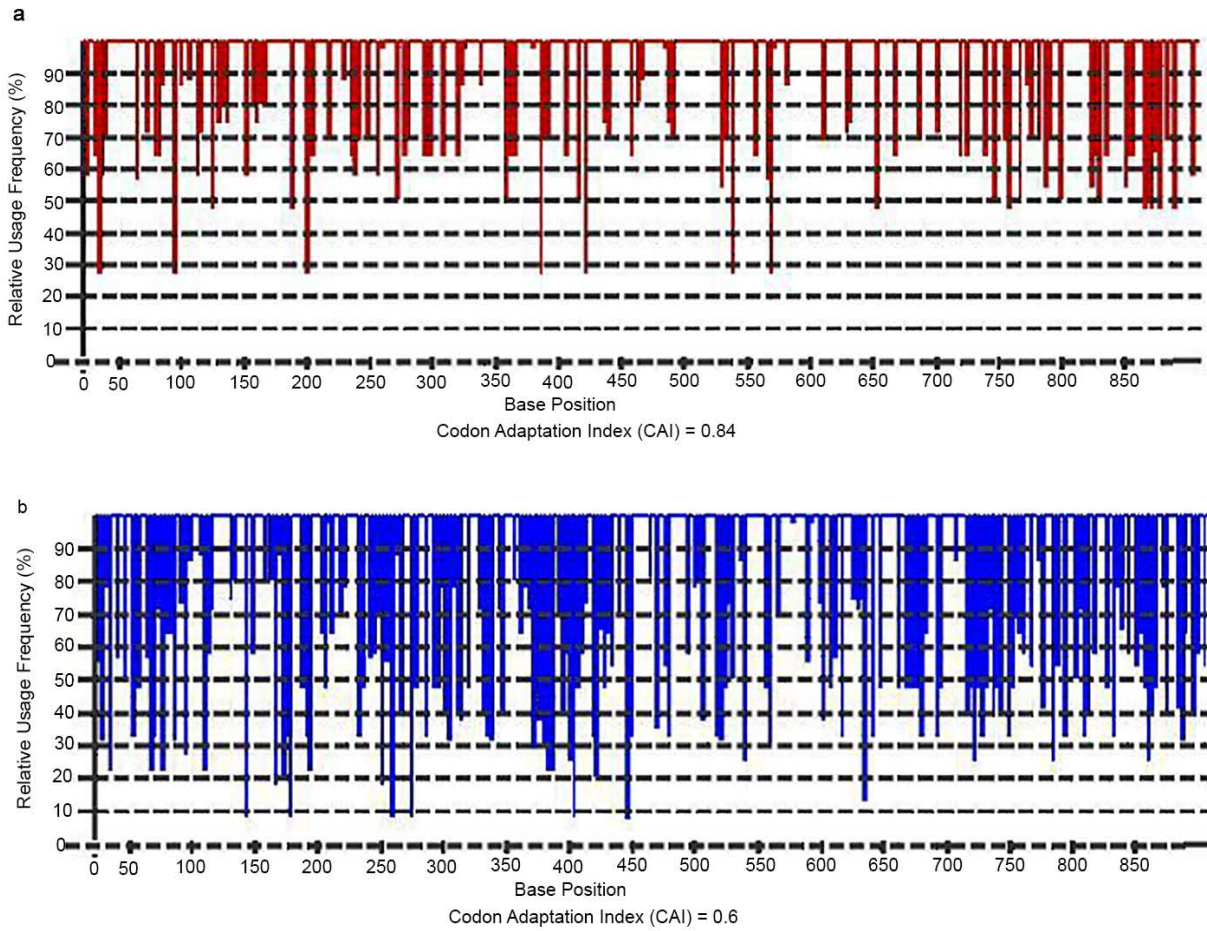

**Fig. S2** Analysis of codon usage bias by Codon Adaptation Index (CAI). CAI measures the deviation of a given protein coding sequence according to a reference set of genes. It provides an indication of gene expression level with a value range from 0 to 1. A higher value predicts a higher expression level. The figure part **a** represents the plot of optimized *iLRP* gene with CAI value of 0.84, and the part **b** represents the plot of wild *iLRP* gene with CAI value of 0.6

```

WT-iLRP: (1) ATGTCCGGAGCCCTT GATGTCCTGCAAATG AAGGAGGAGGATGTC CTTAAGTTCCTTGCA
OP-iLRP: (1) ATGAGTGGCGCATTA GACGTTCTGCAGATG AAAGAAGAAGATGTC CTGAAATTCTGGCA
AA: M S G A L D V L Q M K E E D V L K F L A
WT-iLRP: (61) GCAGGAACCCACTTA GGTGGCACCAATCTT GACTTCCAGATGGAA CAGTACATCTATAAA
OP-iLRP: (61) GCAGGTACCCATTTA GGCGGTTACCAATCTG GACTTCCAGATGGAG CAGTACATCTTACAAA
AA: A G T H L G G T N L D F Q M E Q Y I Y K
WT-iLRP: (121) AGGAAAAGTGATGGC ATCTATATCATAAAT CTCAAGAGGACCTGG GAGAAGCTTCTGCTG
OP-iLRP: (121) CGCAAAGCGACGGC ATCTTACATCATCAAC CTGAAACGCACCTGG GAGAAACTGCTGTTA
AA: R K S D G I Y I I N L K R T W E K L L L
WT-iLRP: (181) GCAGCTCGTGCAATT GTTGCCATTGAAAAC CCTGCTGATGTGAGT GTTATATCCTCCAGG
OP-iLRP: (181) GCAGCACGCGCGATT GTTGCGATTGAAAAT CCGGCAGACGTTAGC GTTATTAGCAGTCGT
AA: A A R A I V A I E N P A D V S V I S S R
WT-iLRP: (241) AATACTGGCCAGAGG GCTGTGCTGAAGTTT GCTGCTGCCACTGGA GCCACTCCAATTGCT
OP-iLRP: (241) AACACCGGCCAACGC GCAGTCTGAAATTT GCAGCAGCAACCGGC GCAACCCCGATTGCA
AA: N T G Q R A V L K F A A A T G A T P I A
WT-iLRP: (301) GGCCGCTTCACTCCT GGAACCTTCACTAAC CAGATCCAGGCAGCC TTCCGGGAGCCACGG
OP-iLRP: (301) GGTCGTTTACCCCG GTTACCTTTACCAAC CAGATTCAAGCAGCA TTTCGCGAACCCGCT
AA: G R F T P G T F T N Q I Q A A F R E P R
WT-iLRP: (361) CTTCTTGTGGTTACT GACCCCAGGGCTGAC CACCAGCCTCTCAGG GAGGCATCTTATGTT
OP-iLRP: (361) CTGTTAGTTGTTACC GATCCGCGCGCAGAT CATCAACCGTTAACC GAAGCGAGCTACGTT
AA: L L V V T D F R A D H Q P L T E A S Y V
WT-iLRP: (421) AACCTACCTACCATT GCGCTGTGTAACACA GATTCTCCTCTGCGC TATGTGGACATTGCC
OP-iLRP: (421) AACTGCCGACCATT GCACTGTGTAATTACC GATAGCCCGGTGCGT TACGTTGATATTCGG
AA: N L P T I A L C N T D S P L R Y V D I A
WT-iLRP: (481) ATCCCATGCAACAAC AAGGGAGCTCACTCA GTGGGTTTGATGTGG TGGATGCTGGCTCGG
OP-iLRP: (481) ATCCGTGCAACAAC AAAGGCGCGCATCTT GTGGCTTAATGTGG TGGATGCTGGCACGC
AA: I P C N N K G A H S V G L M W W M L A R
WT-iLRP: (541) GAAGTTCGTGCGCATG CGTGGCACCATTTCC CGTGAACACCCATGG GAGGTTCATGCCTGAT
OP-iLRP: (541) GAAGCTTTACGTATG CGCGGTACCATTAGC CGGAACATCCGTGG GAAGTATGCCGGAT
AA: E V L R M R G T I S R E H P W E V M P D
WT-iLRP: (601) CTGTACTTCTACAGA GATCCTGAAGAGATT GAAAAGAAGAGCAG GCTGCTGCTGAGAAG
OP-iLRP: (601) CTGTATTTCTACCGC GATCCGGAAGAAATT GAGAAAGAAGAACAG GCAGCGCGGAAAA
AA: L Y F Y R D P E E I E K E E Q A A A E K
WT-iLRP: (661) GCAGTGACCAAGGAG GAATTCAGGGGTGAA TGGACTGCTCCCGCT CCTGAGTTCACTGCT
OP-iLRP: (661) GCGTTACCAAGAA GAATTCAGGGCGAA TGGACCGCACCGGCA CCGGAATTTACCGCA
AA: A V T K E E F Q G E W T A P A P E F T A
WT-iLRP: (721) ACTCAGCCTGAGGTT GCAGACTGGTCTGAA GGTGTACAGGTGCC TCTGTGCCTATTGAG
OP-iLRP: (721) ACCCAACCGGAGTT GCTGATGGTCAGAA GGTGTTCAGGTCCG TCTGTTCCGATTCAA
AA: T Q P E V A D W S E G V Q V P S V P I Q
WT-iLRP: (781) CAATTCCTACTGAA GACTGGAGCGCTCAG CCTGCCACGGAGAC TGGTCTGCAGCTCCC
OP-iLRP: (781) CAGTTTCCGACCGAA GATGGTCTGCACA CCGGCAACCGAAGAT TGGTCTGCAGCACCG
AA: Q F P T E D W S A Q P A T E D W S A A P
WT-iLRP: (841) ACTGCTCAGGCCACT GAATGGGTAGGAGCA ACCACTGACTGGTCT TAA
OP-iLRP: (841) ACCGCTCAAGCTACG GAGTGGGTGGCGCT ACCACCGATTGGAGT TAA
AA: T A Q A T E W V G A T T D W S *

```

**Fig. S3** Sequence comparison between the optimized *iLRP* gene and wild *iLRP* gene. OP: codon optimized; WT: wild type; AA: amino acid. Differences in synonymous codons between the wild and optimized gene were indicated by bold and italic letters. Individual bases in red represent the base replacement with bacterial preferred ones. Translated amino acids are shown in standard single-letter. There is no difference in amino acid sequences between two DNA sequences after translation
